# Supplementary material
Source: PubMed Central journal article supplement (PMC9270482)
Supplement: 41598_2022_15727_MOESM1_ESM.pdf [file 41598_2022_15727_MOESM1_ESM.pdf]

# **Long COVID and Symptom Trajectory in a Representative Sample of Americans in the First Year of the Pandemic**

Qiao Wu\*<sup>1</sup>, Jennifer A. Ailshire<sup>2</sup>, and Eileen M. Crimmins<sup>2</sup>

<sup>1</sup> MIPM, Leonard Davis School of Gerontology, University of Southern California, Los Angeles, California, The United States

<sup>2</sup> PhD, Leonard Davis School of Gerontology, University of Southern California, Los Angeles, California, The United States.

\*Corresponding Author: Qiao Wu

University of Southern California, Andrus Gerontology Center, 3715 McClintock Ave, Room 215, Los Angeles, California 90089-0191

+1 2137067258 | [qiaowu@usc.edu](mailto:qiaowu@usc.edu)

## Supplementary Information

**Supplementary Table 1. Difference between Final Sample and Dropped Participants**

| Covariates                               | Final Sample                       | Dropped                            | T-Test P Values                    |
|------------------------------------------|------------------------------------|------------------------------------|------------------------------------|
|                                          | n = 308<br>% / mean (SD)<br>IQR=26 | n = 564<br>% / mean (SD)<br>IQR=23 | n = 308<br>Final Sample VS Dropped |
| <b>Age in Years (18-110)</b>             | 46.0 (15.8)<br>IQR=26              | 45.8 (15.2)<br>IQR=23              | 0.897                              |
| <b>Age Groups</b>                        |                                    |                                    |                                    |
| 18-49                                    | 56.5                               | 62.1                               | 0.229                              |
| 50-64                                    | 29.9                               | 26.1                               | 0.366                              |
| 65+                                      | 13.6                               | 11.8                               | 0.537                              |
| <b>Gender</b>                            |                                    |                                    |                                    |
| Male                                     | 42.7                               | 44.7                               | 0.674                              |
| Female                                   | 57.3                               | 55.3                               | 0.674                              |
| <b>Race/Ethnicity</b>                    |                                    |                                    |                                    |
| Non-Hispanic White                       | 60.6                               | 53.1                               | 0.136                              |
| Non-Hispanic Black                       | 12.2                               | 11.1                               | 0.757                              |
| Hispanic                                 | 22.4                               | 24.9                               | 0.588                              |
| Non-Hispanic Others                      | 4.9                                | 10.9                               | <b>0.031*</b>                      |
| <b>Education</b>                         |                                    |                                    |                                    |
| High School and Less                     | 40.9                               | 38.7                               | 0.647                              |
| Some College                             | 35.1                               | 31.3                               | 0.378                              |
| College and More                         | 24.0                               | 30.1                               | 0.138                              |
| <b>Current Smoker</b>                    | 29.4                               | 22.4                               | 0.105                              |
| <b>Health Conditions</b>                 |                                    |                                    |                                    |
| Diabetes                                 | 17.7                               | 11.4                               | 0.059                              |
| Cancer                                   | 5.2                                | 4.5                                | 0.745                              |
| Heart Disease                            | 9.2                                | 5.4                                | 0.116                              |
| Hypertension                             | 28.6                               | 31.9                               | 0.451                              |
| Asthma                                   | 18.9                               | 13.3                               | 0.124                              |
| Chronic Lung Disease                     | 4.6                                | 4.0                                | 0.757                              |
| Kidney Disease                           | 4.4                                | 3.0                                | 0.468                              |
| Autoimmune Disorder                      | 4.7                                | 5.4                                | 0.701                              |
| Obesity                                  | 24.2                               | 17.8                               | 0.094                              |
| <b>Symptomatic at Infection</b>          | 80.3                               | 84.7                               | 0.257                              |
| <b>Symptom Count at Infection (0-18)</b> | 6.0 (4.6)<br>IQR=9                 | 5.8 (4.6)<br>IQR=8                 | 0.698                              |

Notes

\* p<0.05 \*\* p<0.01 \*\*\* p<0.001

**Supplementary Table 2. Baseline Sample Characteristics**

|                                                  | <b>COVID<br/>Population in UAS</b><br>n = 872 | <b>Final Sample</b><br>n = 308 | <b>People with Long<br/>COVID</b><br>n = 74 | <b>People without<br/>Long COVID</b><br>n = 234 |
|--------------------------------------------------|-----------------------------------------------|--------------------------------|---------------------------------------------|-------------------------------------------------|
| <b>Covariates</b>                                | % (n) / mean (SD)                             | % (n) / mean (SD)              | % (n) / mean (SD)                           | % (n) / mean (SD)                               |
| <b>Age in Years (18-110)</b>                     | 45.9 (15.4)                                   | 46.0 (15.8)                    | 44.9 (13.9)                                 | 46.4 (16.3)                                     |
|                                                  | IQR=24                                        | IQR=26                         | IQR=21                                      | IQR=28                                          |
| <b>Age Groups</b>                                |                                               |                                |                                             |                                                 |
| 18-49                                            | 60.2 (493)                                    | 56.5 (161)                     | 56.8 (39)                                   | 56.5 (122)                                      |
| 50-64                                            | 27.4 (260)                                    | 29.9 (95)                      | 34.4 (24)                                   | 28.6 (71)                                       |
| 65+                                              | 12.4 (119)                                    | 13.6 (52)                      | 8.9 (11)                                    | 14.9 (41)                                       |
| <b>Gender</b>                                    |                                               |                                |                                             |                                                 |
| Male                                             | 44 (308)                                      | 42.7 (109)                     | 34.9 (22)                                   | 45 (87)                                         |
| Female                                           | 56 (564)                                      | 57.3 (199)                     | 65.1 (52)                                   | 55 (147)                                        |
| <b>Race/Ethnicity</b>                            |                                               |                                |                                             |                                                 |
| Non-Hispanic White                               | 55.7 (512)                                    | 60.6 (203)                     | 62.3 (51)                                   | 60.1 (152)                                      |
| Non-Hispanic Black                               | 11.5 (66)                                     | 12.2 (25)                      | 4.1 (1)                                     | 14.5 (24)                                       |
| Hispanic                                         | 24 (207)                                      | 22.4 (56)                      | 30 (16)                                     | 20.1 (40)                                       |
| Non-Hispanic Others                              | 8.8 (87)                                      | 4.9 (24)                       | 3.6 (6)                                     | 5.3 (18)                                        |
| <b>Education</b>                                 |                                               |                                |                                             |                                                 |
| High School and Less                             | 39.4 (221)                                    | 40.9 (73)                      | 32.3 (15)                                   | 43.4 (58)                                       |
| Some College                                     | 32.6 (367)                                    | 35.1 (139)                     | 39 (39)                                     | 34 (100)                                        |
| College and More                                 | 28 (284)                                      | 24 (96)                        | 28.7 (20)                                   | 22.6 (76)                                       |
| <b>Current Smoker</b>                            | 24.8 (200)                                    | 29.4 (74)                      | 19.7 (15)                                   | 32.2 (59)                                       |
| <b>Health Conditions</b>                         |                                               |                                |                                             |                                                 |
| Diabetes                                         | 13.6 (121)                                    | 17.7 (50)                      | 20 (15)                                     | 17.1 (35)                                       |
| Cancer                                           | 4.8 (50)                                      | 5.2 (17)                       | 1.1 (2)                                     | 6.4 (15)                                        |
| Heart Disease                                    | 6.7 (55)                                      | 9.2 (26)                       | 7.2 (7)                                     | 9.8 (19)                                        |
| Hypertension                                     | 30.7 (272)                                    | 28.6 (97)                      | 33.3 (25)                                   | 27.2 (72)                                       |
| Asthma                                           | 15.2 (122)                                    | 18.9 (47)                      | 24.1 (16)                                   | 17.3 (31)                                       |
| Chronic Lung Disease                             | 4.2 (36)                                      | 4.6 (15)                       | 6.8 (6)                                     | 4 (9)                                           |
| Kidney Disease                                   | 3.5 (26)                                      | 4.4 (13)                       | 7.5 (3)                                     | 3.5 (10)                                        |
| Autoimmune Disorder                              | 5.1 (66)                                      | 4.7 (25)                       | 9.2 (12)                                    | 3.4 (13)                                        |
| Obesity                                          | 20.1 (205)                                    | 24.2 (78)                      | 42.4 (29)                                   | 18.9 (49)                                       |
| <b>New-Onset Symptoms at<br/>Infection Stage</b> |                                               |                                |                                             |                                                 |
| Body aches                                       | -                                             | 44.5 (128)                     | 50.3 (38)                                   | 42.8 (90)                                       |
| Fatigue                                          | -                                             | 43 (124)                       | 47.1 (31)                                   | 41.7 (93)                                       |
| Cough                                            | -                                             | 40.8 (119)                     | 42.7 (32)                                   | 40.3 (87)                                       |
| Headache                                         | -                                             | 40.4 (116)                     | 60 (34)                                     | 34.7 (82)                                       |
| Fever                                            | -                                             | 37.3 (109)                     | 51.7 (32)                                   | 33.1 (77)                                       |
| Runny or stuffy nose                             | -                                             | 34.8 (119)                     | 49.3 (35)                                   | 30.6 (84)                                       |
| Lost of smell                                    | -                                             | 32.7 (100)                     | 43.5 (30)                                   | 29.6 (70)                                       |
| Diarrhea                                         | -                                             | 28.5 (72)                      | 37.7 (27)                                   | 25.9 (45)                                       |
| Sore throat                                      | -                                             | 28 (77)                        | 40.1 (25)                                   | 24.5 (52)                                       |
| Shortness of breath                              | -                                             | 26 (62)                        | 34.9 (19)                                   | 23.4 (43)                                       |
| Chest congestion                                 | -                                             | 25.2 (75)                      | 17.2 (21)                                   | 27.6 (54)                                       |
| Sneezing                                         | -                                             | 24.1 (79)                      | 33.8 (28)                                   | 21.2 (51)                                       |
| > 100.4 °F                                       | -                                             | 22.7 (68)                      | 19.6 (15)                                   | 23.6 (53)                                       |
| Abdominal discomfort                             | -                                             | 22.3 (66)                      | 30.1 (25)                                   | 20 (41)                                         |
| Dryskin                                          | -                                             | 11.2 (31)                      | 15.6 (12)                                   | 10 (19)                                         |
| Vomiting                                         | -                                             | 7.8 (21)                       | 13.7 (9)                                    | 6.1 (12)                                        |
| Skin rash                                        | -                                             | 4 (10)                         | 3.7 (3)                                     | 4.1 (7)                                         |
| Hairloss                                         | -                                             | 2.6 (9)                        | 6.3 (4)                                     | 1.5 (5)                                         |
| <b>Symptomatic at Infection</b>                  |                                               | 80.3 (254)                     | 100 (74)                                    | 74.6 (180)                                      |
| <b>Symptom Count at Infection (0-18)</b>         | 5.8 (4.6)                                     | 6.0 (4.6)                      | 7.9 (3.3)                                   | 5.4 (4.7)                                       |
|                                                  | IQR=8                                         | IQR=9                          | IQR=5                                       | IQR=9                                           |

Note

All percentages and means are weighted to be nationally representative. The unweighted numbers of observations are in parentheses

**Supplementary Figure 1. Percent with Self-Reported Symptoms at Pre-Infection, Infection, and Post-Infection Stages among Those Infected Non-Long-Haulers (n=234)**

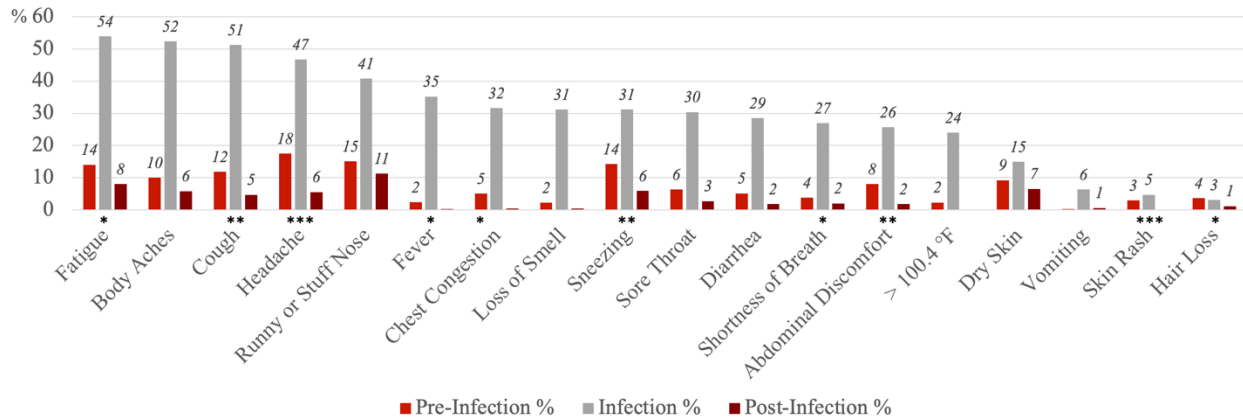

**Notes**

The pre-infection stage is 4 weeks before the COVID diagnosis or positive test.

The infection stage is the time of COVID diagnosis or positive test.

The post-infection stage is 12 weeks after the COVID diagnosis or positive test.

Symptoms were listed based on the proportion reported at the infection stage.

Wald ( $\chi^2$ ) tests were used to determine statistically significant differences in symptoms at the pre-infection stage and post-infection stage, and standard errors were clustered at the individual level.

\*  $p < 0.05$  \*\*  $p < 0.01$  \*\*\*  $p < 0.001$
